# Supplementary material for: Microanalysis Characterization and Immunomodulatory Effect for Selenium-Enriched Polysaccharide from Morchella esculenta (L.) Pers
Source: MDPI journal article supplement (doi:10.3390/molecules28072885), 2023-03-23
Supplement: s1 [file s1]

## Supplementary Materials

# Microanalysis Characterization and Immunomodulatory Effect for Selenium-Enriched Polysaccharide from *Morchella esculenta* (L.) Pers.

Lijuan Qian <sup>1,†</sup>, Mengxiang Du <sup>1,†</sup>, Xiaoyan Yang <sup>1</sup>, Qian Wang <sup>2</sup>, Shengwei Huang <sup>2</sup>, Yuhua Ma <sup>2</sup> and Yujun Sun <sup>2,\*</sup>

<sup>1</sup> College of Agriculture, Anhui Science and Technology University, Fengyang 233100, China

<sup>2</sup> College of Life and Health Sciences, Anhui Science and Technology University, Fengyang 233100, China

\* Correspondence: sunyujun208@126.com

† These authors contributed equally to this work.

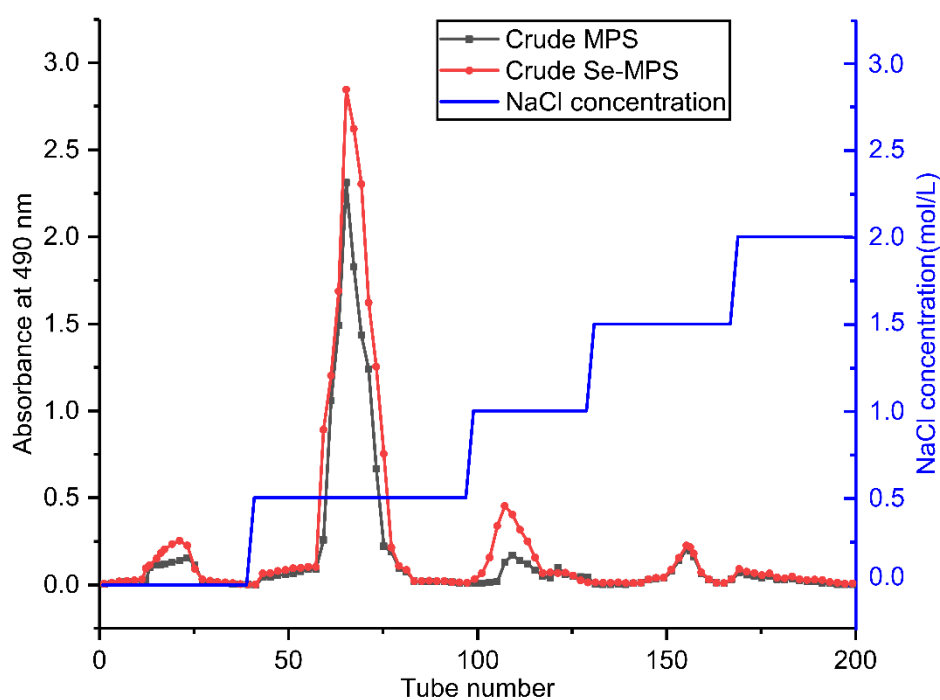

**Figure S1.** Elution curves of crude MPS and Se-MPS.
